# Supplementary material for: The shell matters: one step synthesis of core–shell silicon nanoparticles with room temperature ultranarrow emission linewidth
Source: Royal Society of Chemistry journal article supplement (doi:10.1039/c9fd00093c), 2019-11-04
Supplement: c9fd00093c1.pdf [file c9fd00093c1.pdf]

### Supporting information

S1- TEM image of cross-section of annealed in-HSQ-MIBK layer on silicon substrate

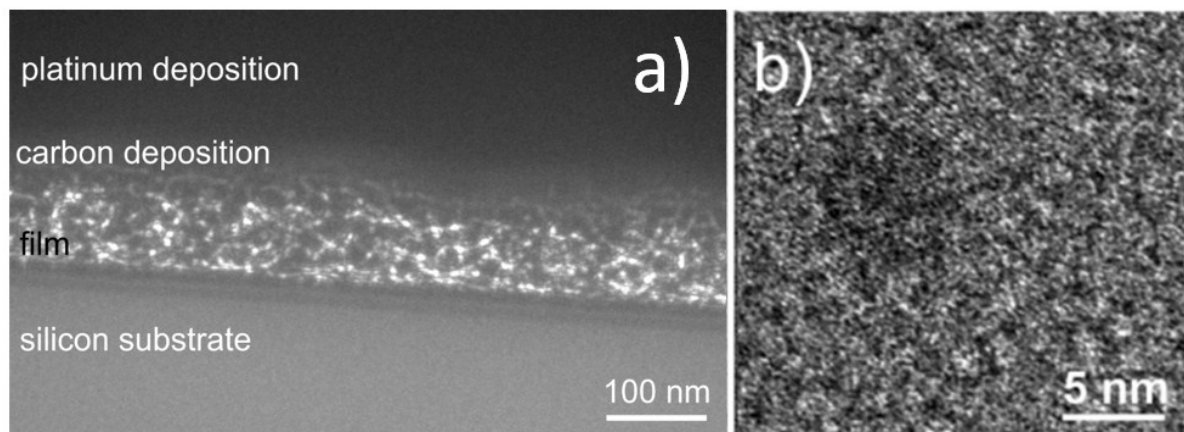

**Figure S1:** a) TEM image of cross-section of annealed in-HSQ-MIBK layer on silicon substrate, b) TEM detail of one Si-NCs released from in-HSQ-MIBK

## S2 FTIR study of HSQ and in-HSQ-MIBK

The annealed in-HSQ-MIBK shares the same peaks as annealed c-HSQ (dashed line I.) belonging to the Si-O cage structure of HSQ. In annealed and non-annealed in-HSQ-MIBK are apparent modifications due to presence of MIBK (dashed line II., IV.). Si-H group is present in both non-annealed c-HSQ and in-HSQ-MIBK and disappears in annealed forms (dashed line III.).

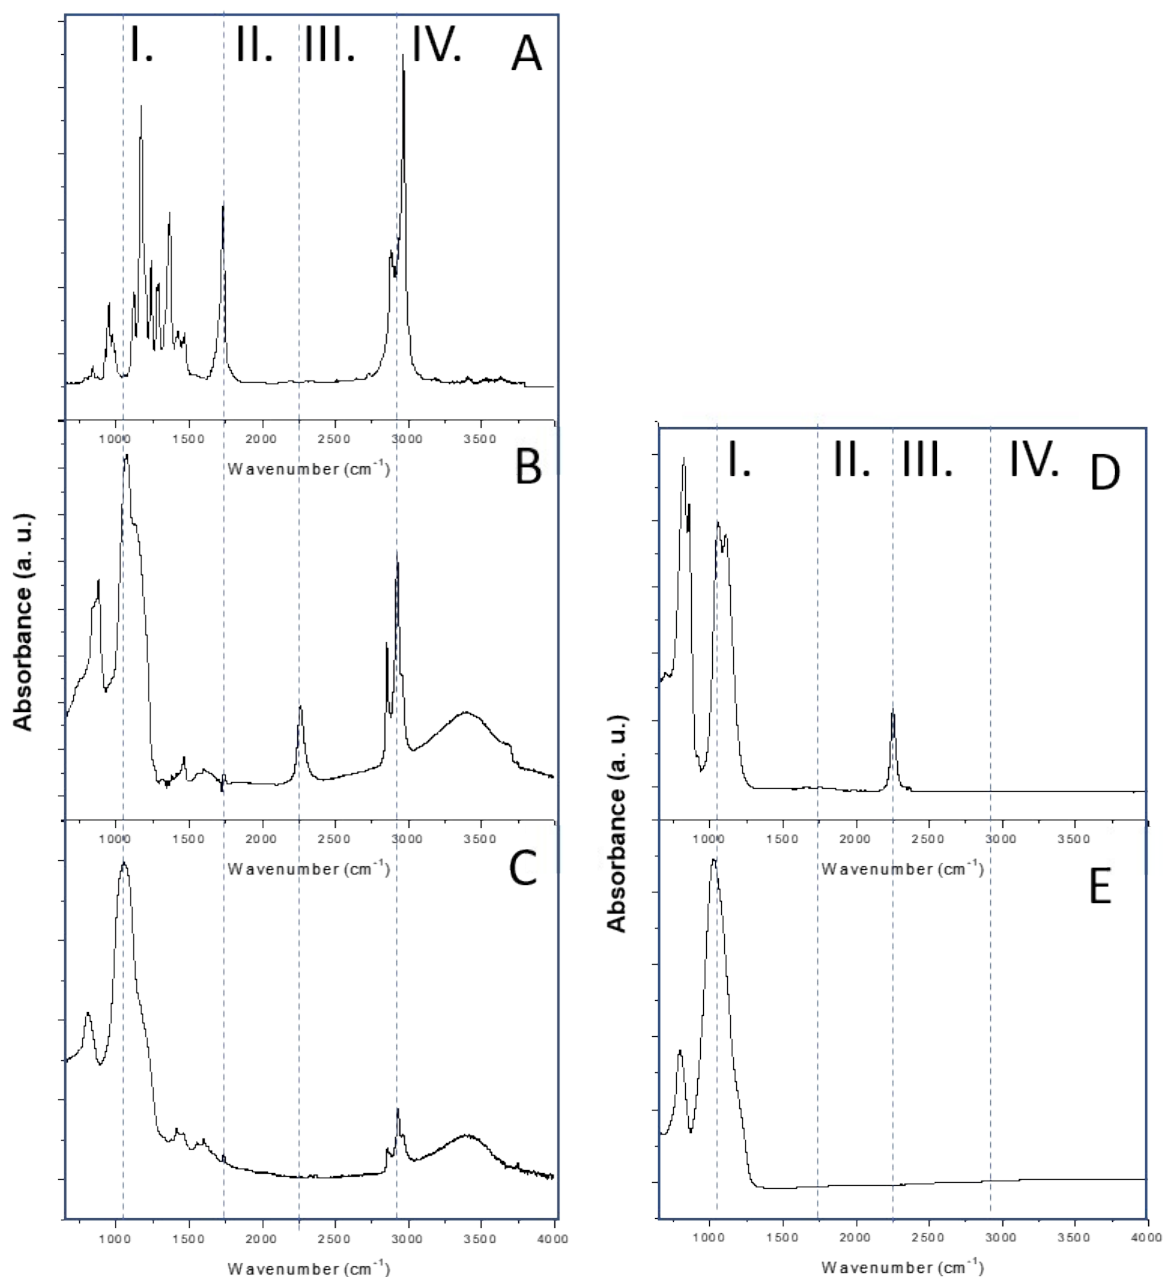

Figure S2: FTIR spectra of A) MIBK pure solution, B) in-HSQ-MIBK before annealing, C) in-HSQ-MIBK after thermal annealing, D) standard c-HSQ before annealing, E) standard c-HSQ after annealing.

### S3 FTIR spectra of in-HSQ-Acetone

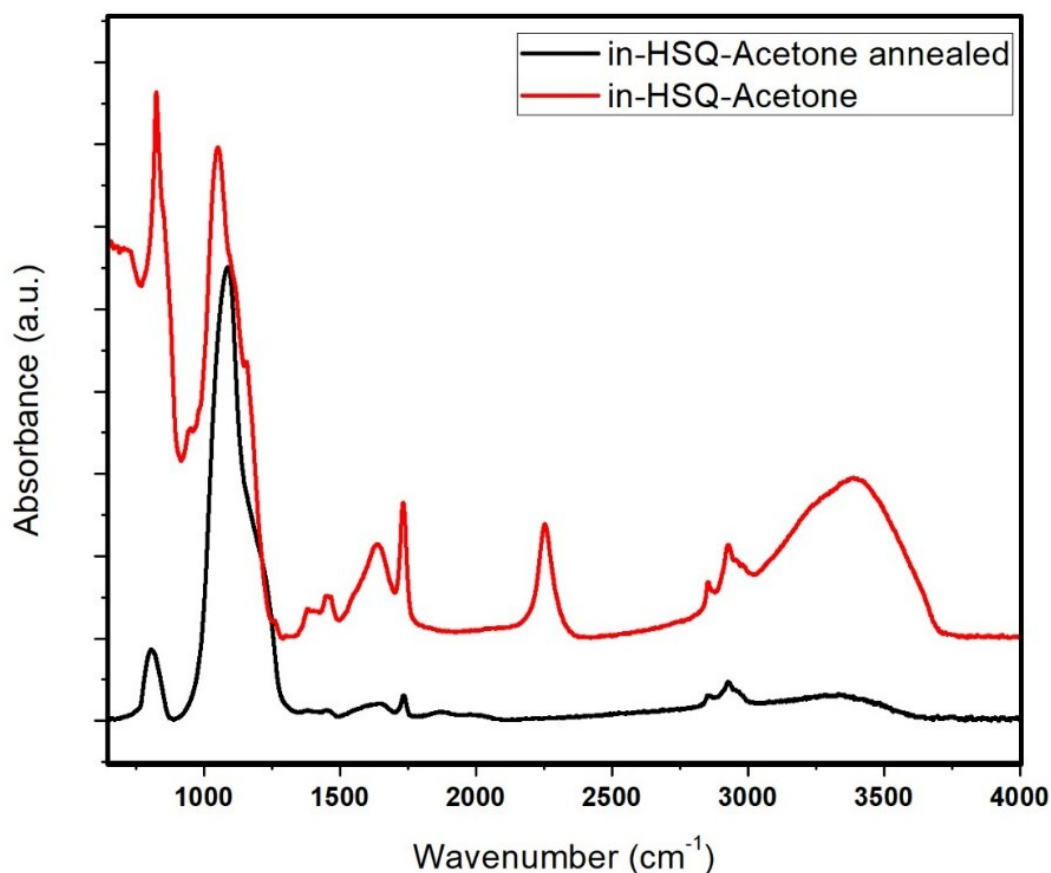

**Figure S3:** FTIR spectra of in-HSQ-Acetone before annealing (red line) and after annealing (black line)

The organic character of in-HSQ-Acetone was preserved after the annealing. The FTIR frequencies belonging to the HSQ molecule are preserved after modification. The interesting spectral zone is from 1200-1740 cm<sup>-1</sup>. The peak 1380 cm<sup>-1</sup> could be assigned to a sym. deformation vibration of C-H and the peak around 1450cm<sup>-1</sup> to C-H asym. deformation vibration whereas the next bond is an ketone for both peaks. The peak around 1635 cm<sup>-1</sup> is typical for C=C stretching vibration. Most importantly the peak tentatively assigned to Si-O-C(=O)-CH<sub>3</sub> in non-annealed form of in-HSQ-Acetone has wavenumber of the 1730 cm<sup>-1</sup> and in annealed form 1735 cm<sup>-1</sup>, whereas in pure acetone the bond -(C=O)- has wavenumber of 1750 cm<sup>-1</sup>. The peak around 3400 cm<sup>-1</sup> which is typical for -OH groups is probably result of acetone bonding to or changing the HSQ polymer.

The FTIR peak around 3400 cm<sup>-1</sup> is assigned to bond -(C=O)- stretching vibrations overtone, whereas the 3 peaks around 3000 cm<sup>-1</sup> are typical for -CH<sub>x</sub> bonds according to the literature.

#### S4 FTIR spectra of in-HSQ-Ethyl-acetate

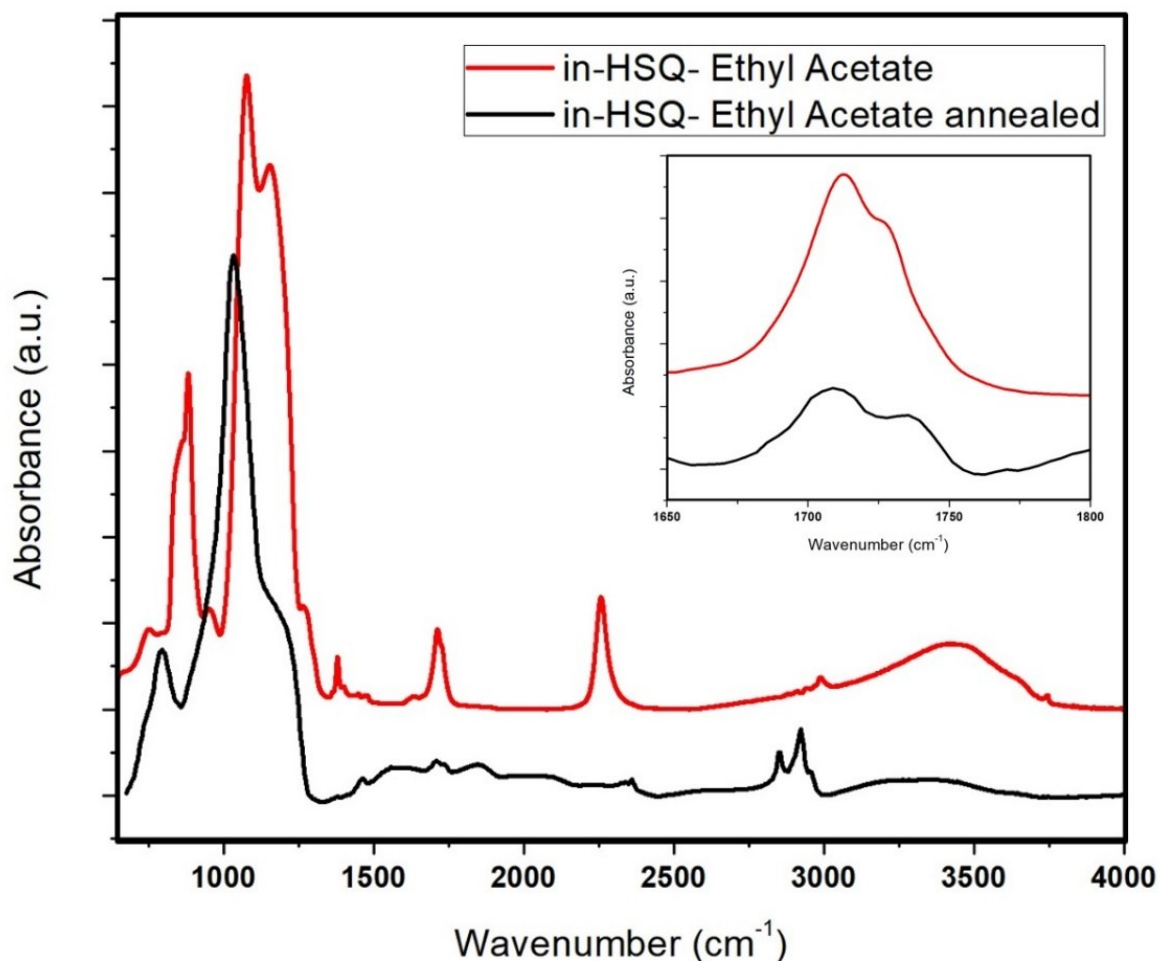

**Figure S4:** FTIR spectra of in-HSQ-Ethyl-acetate before annealing (red line) and after annealing (black line). Inset detail of ketone related vibrations.

The organic character of in-HSQ- Ethyl-acetate was preserved after the annealing. The FTIR peaks belonging to the HSQ molecule are preserved even after modification. The interesting spectral zone is from 1350-2400 cm<sup>-1</sup>. The peak 1380 cm<sup>-1</sup> could be assigned to a sym. deformation vibration of C-H and the peak around 1450cm<sup>-1</sup> to C-H asym. deformation vibration whereas the next bond is an ketone for both peaks.

The peak belonging to carbonyl group has two maxima 1712 cm<sup>-1</sup> and 1727 cm<sup>-1</sup> in non-annealed in-HSQ-Ethyl-acetate and they slightly shifted to values of 1710 cm<sup>-1</sup> and 1735 cm<sup>-1</sup> for annealed sample, suggesting two different chemical species next to the carbonyl group (see Fig.S4 inset). The peak Si-O-C(=O)-X in original ethyl-acetate molecule has peak around 1742 cm<sup>-1</sup>.

The peak around  $3400\text{ cm}^{-1}$  which is typical for  $-\text{OH}$  groups is probably result of ethyl acetate bonding to or changing the HSQ polymer. The broad peak around  $3400\text{ cm}^{-1}$  is similar to the  $3400\text{ cm}^{-1}$  peak we observed for in-HSQ-acetone and MIBK, suggesting that the ethyl acetate can bind to the HSQ also via the oxygen next to the carbonyl group. The 3 peaks around  $3000\text{ cm}^{-1}$  are typical for  $-\text{CH}_x$  bonds and are more visible in annealed in-HSQ-Ethyl-acetate.

### **S5 PL properties of individual Si-NCs prepared from in-HSQ modified by acetone.**

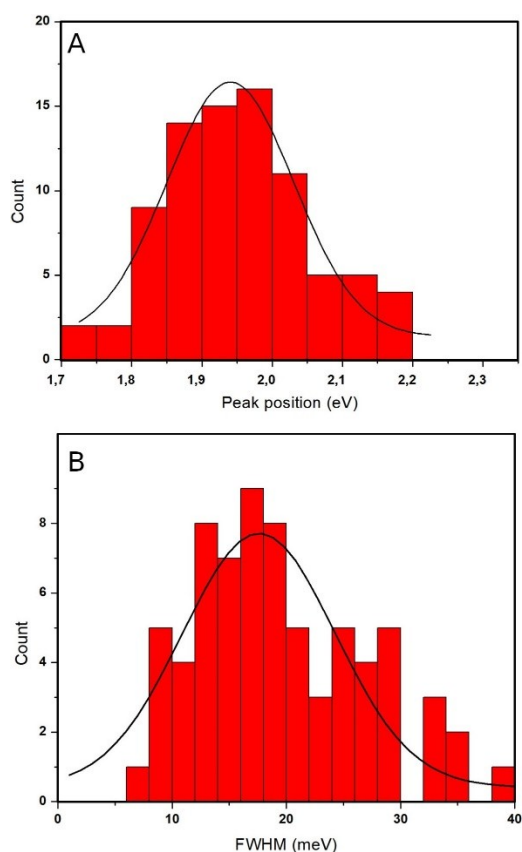

Figure S5: A- PL peak position and B – PL FWHM of single Si-NCs prepared from in-HSQ modified by acetone, measured at room temperature.

**S6 PL properties of individual Si-NCs prepared from in-HSQ modified by ethyl acetate.**

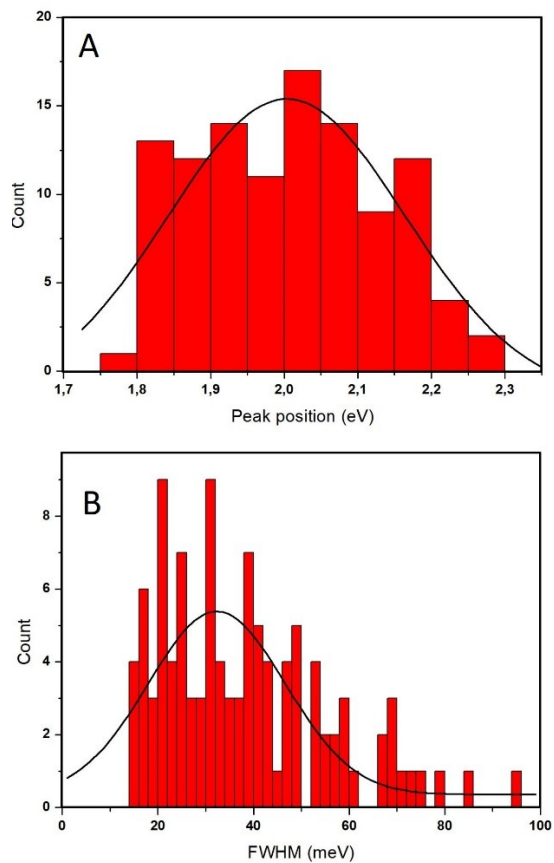

Figure S6: A- PL peak position and B – PL FWHM of single Si-NCs prepared from in-HSQ modified by ethyl acetate, measured at room temperature.
